# Supplementary material
Source: publisher site journal article supplement (https://www.spandidos-publications.com/6688/downloadSupplementary)
Supplement: Supplementary file 1 [file downloadSupplementary]

## Sheet: Table S3
Table SIII. Genes associated with tumor tissue stemness identified by weighted gene co-expression analysis.
Genes
CYBC1
DEF6
LIME1
CD3D
CD7
PTPRCAP
IGFLR1
SEPTIN1
SIT1
FCHO1
LAG3
RGS14
PTPN7
ITGB2-AS1
CARD11
ACAP1
LINC00528
